# Supplementary material for: P. falciparum Modulates Erythroblast Cell Gene Expression in Signaling and Erythrocyte Production Pathways
Source: PLoS One. 2011 May 4;6(5):e19307. doi: 10.1371/journal.pone.0019307 (PMC3087761; doi:10.1371/journal.pone.0019307)
Supplement: Table S2 — Genes associated with top canoncial pathways common to P. falciparum and P. berghei infection. (XLS) [file pone.0019307.s004.xls]

## Sheet: Sheet1
Supplementary Table S2. Genes associated with top canoncial pathways common to P. falciparum and P. berghei infection
Ingenuity Canonical Pathways	Molecules in Pfal infection of erythroid cells	Molecules in Pb infection of hepatocytes
RAR Activation	SRC,RELA,JUN,TGFB1,PIK3R1,RARA,RXRA	STAT5A,TRIM24,RDH11,MAP3K1,JAK2,PTEN,KAT2B,ADH7,DUSP1,ALDH1A7,PRKAG2,IGFBP3,PRKAR1B,PPARGC1A,PRKCA
PXR/RXR Activation	RELA,CES2 (includes EG:8824),RXRA,ABCB9	GSTM2,ALDH1A7,PRKAR1B,PRKAG2,IGFBP1,NR3C1,PAPSS2,PPARGC1A
LPS/IL-1 Mediated Inhibition of RXR Function	JUN,RARA,CES2 (includes EG:8824),RXRA,ABCC4,ABCB9	GSTA3,ACSL3,FMO2,NR1H4,APOC4,MAP3K1,SLC35A2,IL1R1,CHST15,PAPSS2,GSTM2,GSTA4,ALDH1L2,SREBF1,CAT,ACSL4,HS3ST1,GSTT2,ALDH18A1,GSTO2,HMGCS1,ABCC4,ACSL1,MAOA
